# Supplementary material for: Molecular Characterization of Fungal Biodiversity in Long-Term Polychlorinated Biphenyl-Contaminated Soils
Source: MDPI journal article supplement (doi:10.3390/microorganisms9102051), 2021-09-28
Supplement: s1 [file s1]

## Supplementary materials

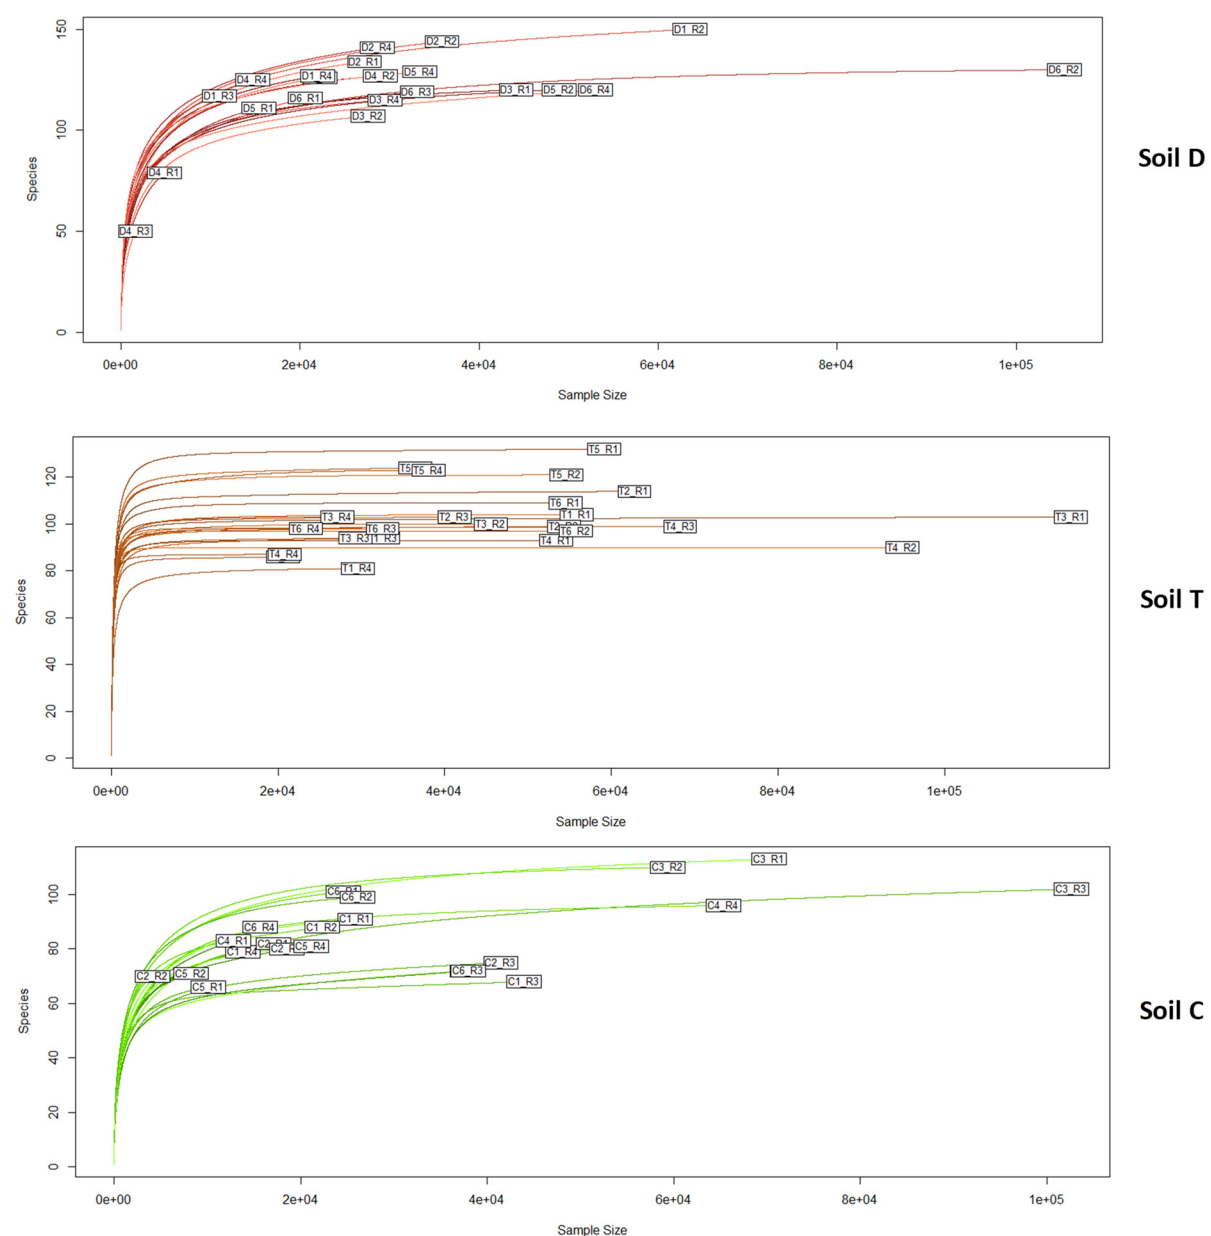

**Figure S1.** Rarefaction curves from the number of sequences from the three studied soil samples.

**Table S1.** Effects of soil type and PCB concentrations on the evenness and richness of fungal communities (\*\* $P < 0.001$ , \*\* $P < 0.01$ , \* $P < 0.05$ ).

| <b>(Evenness)</b> |    |                |                         |            |        |        |
|-------------------|----|----------------|-------------------------|------------|--------|--------|
|                   | Df | R <sup>2</sup> | Adjusted R <sup>2</sup> | Variance   | F      | Pr(>F) |
| PCB               | 1  | 0.0669         | 0.00858                 | 0.00015255 | 1.1471 | 0.295  |
| Soil              | 4  | 0.95015        | 0.93481                 | 0.00216664 | 61.945 | 0.001  |
| Residual          |    |                | 0.05685                 |            |        |        |
| Total             | 18 |                |                         | 0.0022803  |        |        |
| <b>(Richness)</b> |    |                |                         |            |        |        |
|                   | Df | R <sup>2</sup> | Adjusted R <sup>2</sup> | Variance   | F      | Pr(>F) |
| PCB               | 1  | 0.25282        | 0.20612                 | 113.18     | 5.4138 | 0.026  |
| Soil              | 4  | 0.62168        | 0.50527                 | 278.31     | 5.3405 | 0.011  |
| Residual          |    |                | 0.53592                 |            |        |        |

**Table S2.** Variance partitioning indicating the effects of PCBs and soil physico-chemical properties on the distribution of fungal communities in the 3 studied soils (\*\* $P < 0.001$ , \*\* $P < 0.01$ , \* $P < 0.05$ ).

|                | Df | Sum Of Squares | R <sup>2</sup> | F       | Pr(>F) |
|----------------|----|----------------|----------------|---------|--------|
| Total PCB      | 1  | 2.0671         | 0.37771        | 26.3015 | 0.001  |
| Nitrogen       | 1  | 1.5963         | 0.29168        | 20.3109 | 0.001  |
| Carbon         | 1  | 0.6155         | 0.11247        | 7.8318  | 0.001  |
| pH             | 1  | 0.1921         | 0.03511        | 2.4446  | 0.032  |
| Organic Matter | 1  | 0.0586         | 0.0107         | 0.7453  | 0.535  |
| Residual       | 12 | 0.9431         | 0.17233        |         |        |
| Total          | 17 | 5.4727         | 1              |         |        |
